# Supplementary material for: Comparison of standing postural control and gait parameters in people with and without chronic low back pain: a cross-sectional case–control study
Source: PubMed Central journal article supplement (PMC5783032; doi:10.1136/bmjsem-2017-000286), 2018-01-23
Supplement: bmjsem-2017-000286supp001.pdf [file bmjsem-2017-000286supp001.pdf]

## Appendix 1

### Centre of pressure calculations

Centre of pressure (CoP) calculations were made from the output from two force plates inset in the laboratory floor. The figure below demonstrates the x, y and z axes of the force plates. Yellow arrow represents the x-axis; green arrow, the y-axis; and orange arrow, the z-axis.

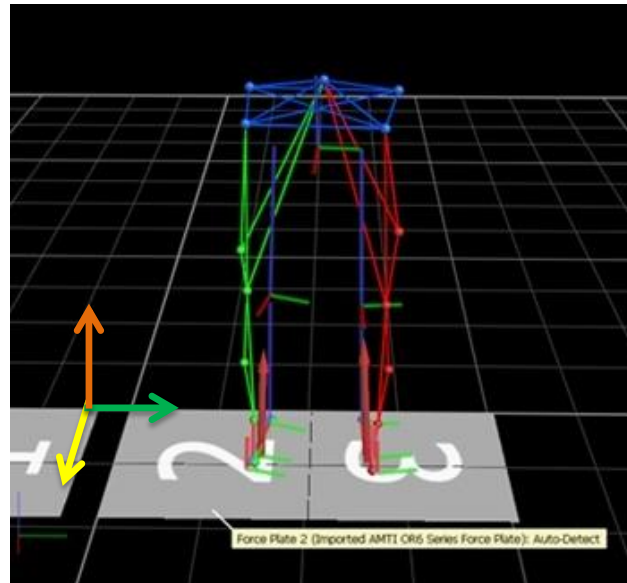

The x-coordinate of the CoP was calculated under each limb from the moments and forces produced by each plate with respect to the origin of the laboratory space, as follows:

$$x_{CoPl_i} = \frac{-M_{yl_i}}{F_{zl_i}} + plate\ origin_{xl}$$
$$x_{CoPr_i} = \frac{-M_{yr_i}}{F_{zr_i}} + plate\ origin_{xr}$$

where  $x_{CoPl_i}, x_{CoPr_i}$  are x- coordinates of the CoP under the left and right feet at time point  $i$ , and  $M_{yl_i}, M_{yr_i}, F_{zl_i}, F_{zr_i}$  are directional components of the moments and forces acting on the body from each force plate. These coordinates are expressed relative to the global coordinates of the laboratory space by a translation between the origin of the force plate and the origin of the laboratory ( $plate\ origin_{xl}, plate\ origin_{xr}$ ).

The x-coordinate of the CoP of the whole body was calculated by multiplying the x-coordinate of the CoP for each limb by the fraction of the total vertical force ( $F_z$ ) acting through that limb, and adding the two terms together, as follows:

$$x_{CoP\_i} = x_{CoPL\_i} * \left( \frac{F_{zL\_i}}{F_{zL\_i} + F_{zR\_i}} \right) + x_{CoPr\_i} * \left( \frac{F_{zR\_i}}{F_{zL\_i} + F_{zR\_i}} \right)$$

where  $x_{CoP\_i}$  is the x-coordinate of the CoP of the whole body.

### Calculation of the root mean squared error of the centre of pressure in the antero-posterior direction ( $CoP_{RMSE\_AP}$ )

The root mean squared error of the CoP in the antero-posterior direction (x-direction) is given by:

$$CoP_{RMSE\_AP} = \sqrt{\sum_i^N \frac{(x_{CoP\_i} - \overline{x_{CoP\_i}})^2}{N}}$$

where  $\overline{x_{CoP\_i}}$  is the mean position of the x-coordinate of the CoP, and N is the number of time points in the trial.

### Calculation of centre of pressure velocity in the antero-posterior direction ( $CoP_{VEL\_AP}$ )

The mean velocity of the CoP in the antero-posterior direction (x-direction) is given by:

$$CoP_{VEL\_AP} = \sum_i \frac{|x_{CoP\_i} - x_{CoP\_i-1}|}{N} * f_s$$

where  $f_s$  is the data sampling frequency.
